# Supplementary material for: Comparative transcriptomics reveals a highly polymorphic Xanthomonas HrpG virulence regulon
Source: PubMed Central journal article supplement — BMC Genomics. 2024 Aug 9;25:777. doi: 10.1186/s12864-024-10684-6 (PMC11316434; doi:10.1186/s12864-024-10684-6), 2024-08-09
Supplement: 12864_2024_10684_MOESM5_ESM.pdf [file 12864_2024_10684_MOESM5_ESM.pdf]

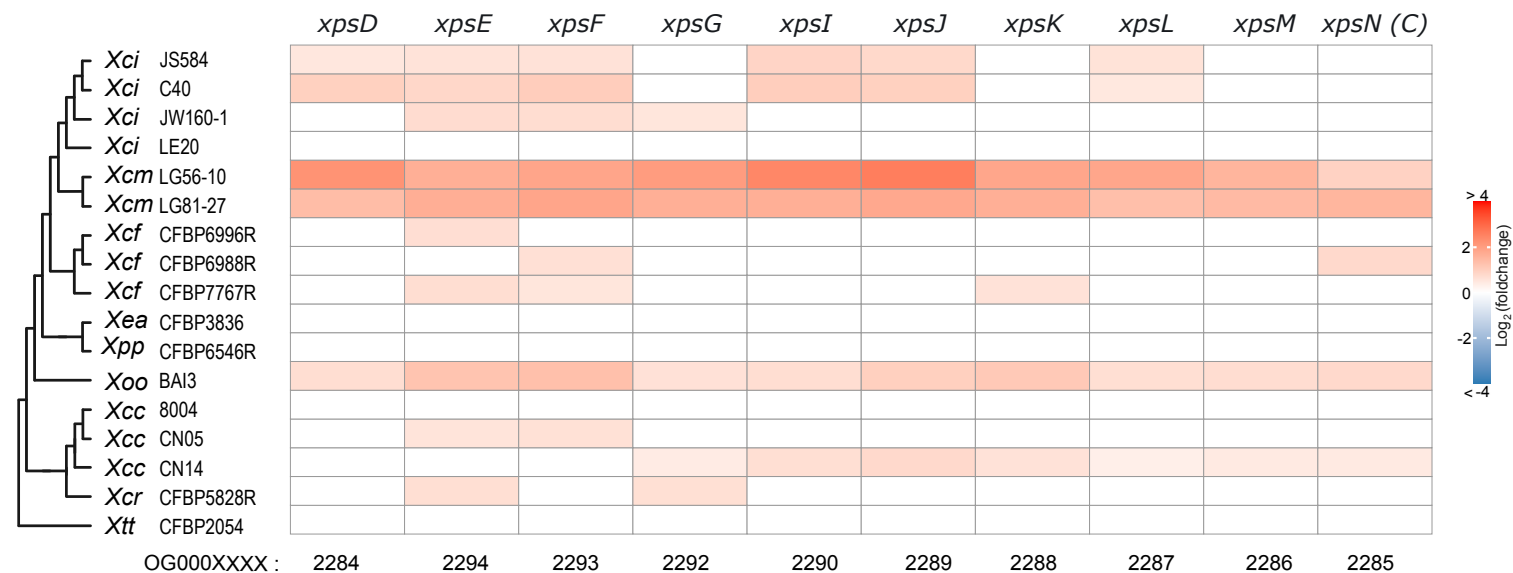

**Figure S1: Regulation of orthogroups (OG) encoding different structural components of the T2SS.** Only significantly differentially expressed ( $\text{AdjPval} < 0.05$ ) genes are colored. Orthogroup annotation is given on top of the figure, orthogroup number at bottom of the figure.

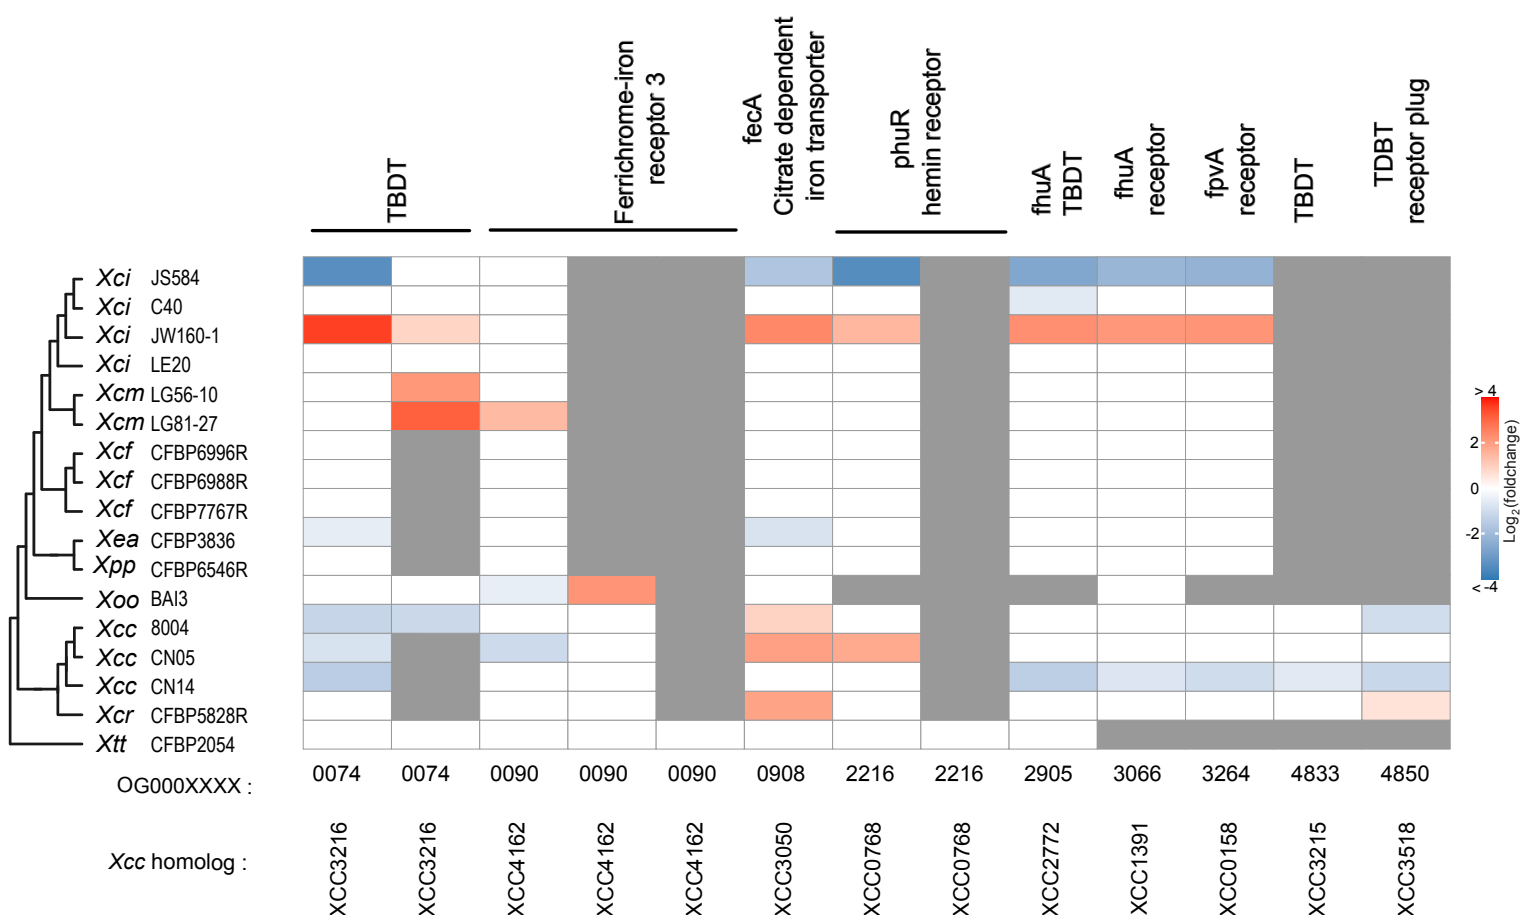

**Figure S2: Regulation of orthogroups (OG) encoding genes putatively involved in iron uptake.** Only significantly differentially expressed ( $\text{AdjPval} < 0.05$ ) genes are colored. Orthogroup annotation is given on top of the figure, orthogroup number at bottom of the figure. Genes represented are orthologs of genes identified to be involved in iron uptake in *Xcc* and are induced upon iron starvation (Blanvillain *et al.*, 2007).
